# Supplementary material
Source: Springer Nature journal article supplement (https://www.springermedizin.de/resource/supplementary/12885_2013_4266_MOESM9_ESM.pdf/9466648)

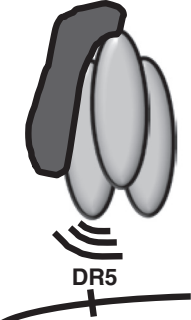

**No MUC16**

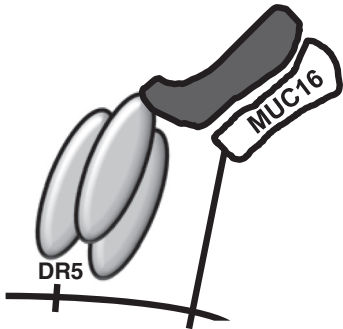

Supplement: MOESM9 [file 9466648]
